# Supplementary material
Source: PubMed Central journal article supplement (PMC9763227)
Supplement: thoraxjnl-2021-218068supp002.pdf [file thoraxjnl-2021-218068supp002.pdf]

**Prof. Dr. med. H. Drexler**  
**Institute and Outpatient Clinic for Occupational, Social and Environmental Medicine of**  
**the University of Erlangen-Nuremberg**  
**Schillerstr.25 D-91054 Erlangen**

Intercomparison programme 61, 2018 for toxicological analyses in biological materials

Inst. für Arbeits-, Sozial- und Umweltmedizin, Schillerstr. 25, 91054 Erlangen

Environmental Analysis Unit  
Occupational and Environmental Medicine  
Att: Thomas Lundh, Dr Med Sci  
22185 Lund  
Sweden

**Labor: 336**

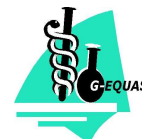

Erlangen, 2018/07/07

## Youden Plot

| No. | parameter      | evaluation   | your results   | ref. value     | tolerance range                | unit         |
|-----|----------------|--------------|----------------|----------------|--------------------------------|--------------|
| 83  | 3-PBA in urine | A: +<br>B: + | 0.660<br>3.240 | 0.614<br>2.915 | 0.488 - 0.740<br>2.459 - 3.371 | µg/l<br>µg/l |

3-PBA in urine (Environmental medical field)

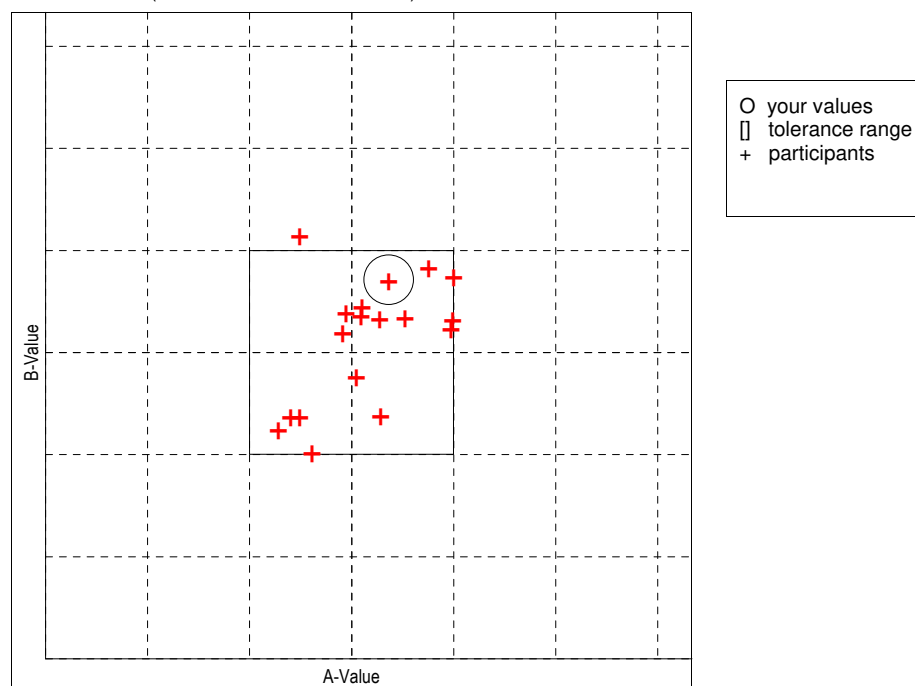

|                                           | <b>A</b> | <b>B</b>         |
|-------------------------------------------|----------|------------------|
| number of participants                    | 18       | 18               |
| within 3-fold tolerance range             | 18       | 18               |
| mean of 3-fold tolerance range            | 0.632    | 2.976            |
| standard deviation 3-fold tolerance range | 0.068    | 0.273            |
| both values within tolerance range        |          | 17 Labs; (94.4%) |

**Prof. Dr. med. H. Drexler**  
**Institute and Outpatient Clinic for Occupational, Social and Environmental Medicine of**  
**the University of Erlangen-Nuremberg**  
**Schillerstr.25 D-91054 Erlangen**

Intercomparison programme 61, 2018 for toxicological analyses in biological materials

Inst. für Arbeits-, Sozial- und Umweltmedizin, Schillerstr. 25, 91054 Erlangen

Environmental Analysis Unit  
Occupational and Environmental Medicine  
Att: Thomas Lundh, Dr Med Sci  
22185 Lund  
Sweden

**Labor: 336**



Erlangen, 2018/07/07

## Youden Plot

| No. | parameter                   | evaluation   | your results  | ref. value    | tolerance range              | unit         |
|-----|-----------------------------|--------------|---------------|---------------|------------------------------|--------------|
| 166 | Trichloropyridinol in urine | A: +<br>B: + | 2.69<br>50.90 | 2.28<br>48.38 | 1.59 - 2.97<br>39.38 - 57.38 | µg/l<br>µg/l |

Trichloropyridinol in urine (Environmental medical field)

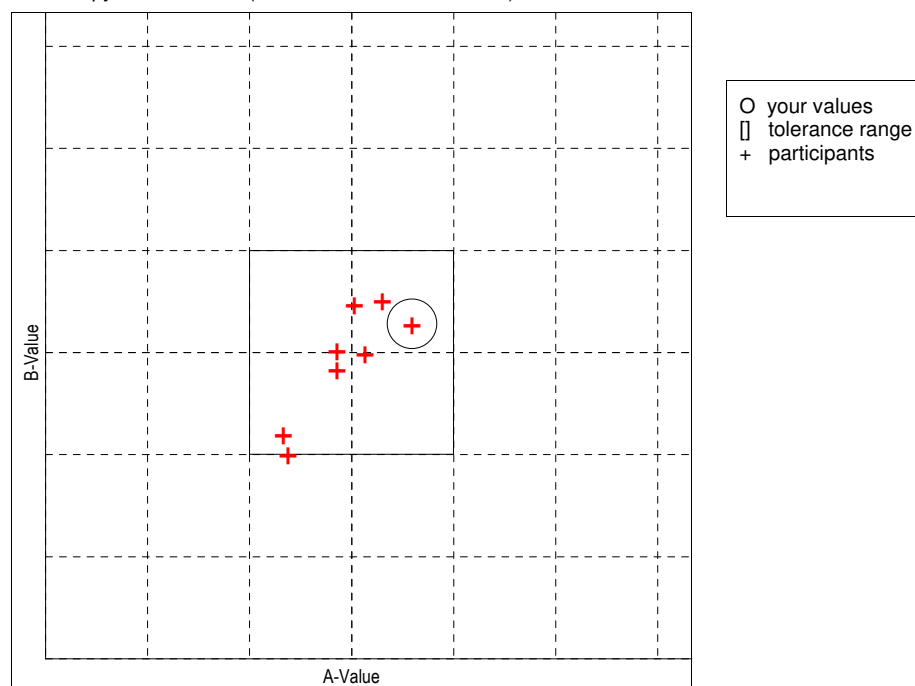

|                                           |          |                  |
|-------------------------------------------|----------|------------------|
|                                           | <b>A</b> | <b>B</b>         |
| number of participants                    | 8        | 8                |
| within 3-fold tolerance range             | 8        | 8                |
| mean of 3-fold tolerance range            | 2.24     | 47.60            |
| standard deviation 3-fold tolerance range | 0.28     | 4.68             |
| both values within tolerance range        |          | 8 Labs; (100.0%) |

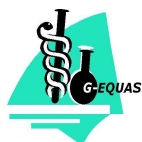

German External Quality Assessment Scheme

**Intercomparison programme 61, 2018  
for toxicological analyses in biological materials**

**Prof. Dr. med. H. Drexler**  
**on behalf of the German Society for Occupational and Environmental Medicine e.V**

Schillerstr 25, D-91054 Erlangen

External Quality Control acc. to the Guidelines of the German Federal Medical Council

Teilnehmer: Environmental Analysis Unit 336  
Occupational and Environmental Medicine  
Att: Thomas Lundh, Dr Med Sci  
22185 Lund  
Sweden

## Certificate

**valid until July 31, 2019**

This is to certify you participated in the intercomparison programme 61 / 2018 for occupational / environmental medical - toxicological analyses. In accordance with the guidelines issued by the German Federal Medical Council (Bundesärztekammer) of January 16th, 1987 and October 16th, 1987 and August 24th, 2001 on implementation of intercomparison programmes in the medical field you have fulfilled the requirements for the following parameters:

### Environmental medical field

Pb in blood  
3-PBA in urine  
5-oxo-MEHP in urine  
PFOA in serum  
Sr in urine  
Sb in urine  
TCS in urine

Pt in urine  
Cotinine in urine  
5-carboxy-MEPP in urine  
PFOS in serum  
Zn in urine  
Mo in urine

1-HP in urine  
5-OH-MEHP in urine  
MEHP in urine  
MBzP in urine  
Trichloropyridinol in urine  
Sn in urine

Erlangen, 2018/07/07

Prof. Dr. med. H. Drexler

Prof. Dr. rer. nat. Th. Göen
