# Supplementary material
Source: PubMed Central journal article supplement (PMC9763227)
Supplement: thoraxjnl-2021-218068supp003.pdf [file thoraxjnl-2021-218068supp003.pdf]

## Supplementary Material

|                                                                                                                                                                                                                                                                                                                                                               |    |
|---------------------------------------------------------------------------------------------------------------------------------------------------------------------------------------------------------------------------------------------------------------------------------------------------------------------------------------------------------------|----|
| <b>Table S1:</b> Questions used to evaluate respiratory and allergic outcomes that form part of the ISAAC-III questionnaire unless indicated elsewhere.....                                                                                                                                                                                                   | 3  |
| <b>Table S2:</b> Spearman correlation coefficients of respiratory and allergic outcomes.....                                                                                                                                                                                                                                                                  | 4  |
| <b>Table S3:</b> Spearman correlation coefficients of averaged maternal specific gravity-adjusted urinary pesticide metabolite concentrations during pregnant with current children's concentration.....                                                                                                                                                      | 5  |
| <b>Table S4:</b> Odds ratios adjusted for child's sex and maternal smoking during pregnancy for each <b>10-fold increase</b> in specific pesticide metabolite concentrations and childhood respiratory outcomes. ISA study at five years of age, Matina County, Costa Rica 2015-2016.....                                                                     | 6  |
| <b>Table S5:</b> Odds ratios adjusted for maternal smoking during pregnancy, child's sex of high ( $\geq P75$ ) specific pesticide exposures and childhood respiratory outcomes, including both <b>prenatal and current exposures</b> in the same model. ISA study at five years of age. Matina County. Costa Rica 2015-2016.....                             | 7  |
| <b>Table S6:</b> Odds ratios adjusted for child's sex and maternal smoking during pregnancy for each <b>10-fold increase</b> in specific pesticide metabolite concentrations and childhood respiratory outcomes, including <b>prenatal and current exposures in the same model</b> . ISA study at five years of age, Matina County, Costa Rica 2015-2016..... | 8  |
| <b>Table S7:</b> Odds ratios adjusted for maternal smoking during pregnancy, child's sex, <b>parity, and maternal history asthma</b> of high ( $\geq P75$ ) specific pesticide exposures and <b>childhood respiratory outcomes</b> . ISA study at five years of age. Matina County. Costa Rica 2015-2016.....                                                 | 9  |
| <b>Table S8:</b> Odds ratios adjusted for maternal smoking during pregnancy, child's sex, <b>parity, and breastfeeding</b> of high ( $\geq P75$ ) specific pesticide exposures and <b>childhood respiratory outcomes</b> . ISA study at five years of age. Matina County. Costa Rica 2015-2016.....                                                           | 9  |
| <b>Table S9:</b> Odds ratios adjusted for <b>current smoking in house</b> , child's sex, and <b>parity</b> of high ( $\geq P75$ ) specific pesticide exposures and <b>childhood respiratory outcomes</b> . ISA study at five years of age. Matina County. Costa Rica 2015-2016.....                                                                           | 10 |
| <b>Table S10:</b> Odds ratios adjusted for child's sex and maternal smoking during pregnancy for each <b>10-fold increase</b> in specific pesticide metabolite concentrations and <b>childhood allergic outcomes</b> . ISA study at five years of age, Matina County, Costa Rica 2015-2016.....                                                               | 11 |
| <b>Table S11:</b> Odds ratios adjusted for maternal smoking during pregnancy, child's sex of high ( $\geq P75$ ) specific pesticide exposures and <b>childhood allergic outcomes</b> , including <b>prenatal and current exposures</b> in the same model. ISA study at five years of age. Matina County. Costa Rica 2015-2016.....                            | 12 |
| <b>Table S12:</b> Odds ratios adjusted for child's sex and maternal smoking during pregnancy for each <b>10-fold increase</b> in specific pesticide metabolite concentrations and <b>childhood allergic outcomes, including prenatal and current exposures</b> in the same model. ISA study at five years of age, Matina County, Costa Rica 2015-2016.....    | 13 |
| <b>Table S13:</b> Odds ratios adjusted for maternal smoking during pregnancy, child's sex, <b>parity, and maternal history of asthma</b> (yes/no), of high ( $\geq P75$ ) specific pesticide exposures and <b>childhood allergic outcomes</b> . ISA study at five years of age. Matina County. Costa Rica 2015-2016.....                                      | 14 |
| <b>Table S14:</b> Odds ratios adjusted for maternal smoking during pregnancy, child's sex, <b>parity, and breastfeeding</b> of high ( $\geq P75$ ) specific pesticide exposures and <b>childhood allergic outcomes</b> . ISA study at five years of age. Matina County. Costa Rica 2015-2016.....                                                             | 15 |
| <b>Table S15:</b> Odds ratios adjusted for <b>current smoking in house</b> , child's sex, and <b>parity</b> of high ( $\geq P75$ ) specific pesticide exposures and <b>childhood allergic outcomes</b> . ISA study at five years of age. Matina County. Costa Rica 2015-2016.....                                                                             | 16 |

|                                                                                                                                                                                                                                                                     |    |
|---------------------------------------------------------------------------------------------------------------------------------------------------------------------------------------------------------------------------------------------------------------------|----|
| <b>Table S16:</b> Odds ratios adjusted for maternal smoking during pregnancy and child's sex for recent environmental exposures and current <b>respiratory outcomes</b> in 293 five-year-old children from the ISA study. Matina County, Costa Rica. 2015-2016..... | 17 |
| <b>Table S17:</b> Odds ratios adjusted for maternal smoking during pregnancy and child's sex for recent environmental exposures and current <b>allergic outcomes</b> in 293 five-year-old children from the ISA study. Matina County, Costa Rica. 2015-2016.....    | 18 |

**Table S1:** Questions used to evaluate respiratory and allergic outcomes that form part of the ISAAC-III questionnaire<sup>1</sup> unless indicated otherwise

| Type of outcome     | Outcome                                     | Definition: A positive answer to the following questions:                                                                                            |
|---------------------|---------------------------------------------|------------------------------------------------------------------------------------------------------------------------------------------------------|
| Respiratory, asthma | Ever wheeze                                 | Has your child <u>ever</u> had wheezing or whistling in the chest at any time in the past?                                                           |
|                     | Current wheeze*                             | Has your child had wheezing or whistling in the chest <u>in the past 12 months</u> ?                                                                 |
|                     | Severity of asthma symptoms                 | How many attacks of wheezing has your child had <u>in the past 12 months</u> ?                                                                       |
|                     | Severity of asthma symptoms                 | <u>In the past 12 months</u> , how often, on average, has your child's sleep been disturbed due to wheezing?                                         |
|                     | Severity of asthma symptoms                 | <u>In the past 12 months</u> , has wheezing ever been severe enough to limit your child's speech to only one or two words at a time between breaths? |
|                     | Ever doctor-diagnosed asthma*               | Has your child ever been diagnosed with asthma by a doctor? **                                                                                       |
| Respiratory, LRTI   | Current dry cough at night*                 | In the past 12 months, has your child had a dry cough at night, apart from a cough associated with a cold or chest infection?                        |
|                     | Ever LRTI                                   | Has your child <u>ever</u> been diagnosed with pneumonia or chest infections (bronchitis, bronchiolitis), at any point in their life? **             |
|                     | Current LRTI*                               | Has your child presented any episodes of pneumonia or chest infection (bronchitis, bronchiolitis) <u>in the last 12 months</u> ? **                  |
| Allergic, Rhinitis  | Ever nasal allergies (allergic rhinitis)    | Has your child <u>ever</u> had a problem with sneezing, or a runny, or blocked nose when he/she DID NOT have a cold or the flu?                      |
|                     | Current nasal allergies                     | <u>In the past 12 months</u> , has your child had a problem with sneezing, or a runny, or blocked nose when he/she DID NOT have a cold or the flu?   |
|                     | Current allergic rhinoconjunctivitis        | <u>In the past 12 months</u> , has this nose problem been accompanied by itchy-watery eyes?                                                          |
| Allergic, Eczema    | Ever itchy rash (symptoms of atopic eczema) | Has your child ever had an itchy rash which was coming and going for at least six months?                                                            |
|                     | Current itchy rash                          | Has your child had this itchy rash at any time in the past 12 months?                                                                                |
|                     | Ever doctor-diagnosed eczema*               | Has your child ever been diagnosed with, or said to have, eczema or skin allergy? **                                                                 |

*Abbreviations:* LRTI: lower respiratory tract infection

\*Selected for epidemiological analysis

\*\* Not part of ISAAC-III questionnaire

<sup>1</sup> Mallol J, Crane J, von Mutius E, *et al.* The International Study of Asthma and Allergies in Childhood (ISAAC) Phase Three: A global synthesis. *Allergol Immunopathol (Madr)* 2013;**41**:73–85. doi:10.1016/j.aller.2012.03.001

**Table S2:** Spearman correlation coefficients of respiratory and allergic outcomes.

| <b>Outcome</b>                           | <b>Ever doctor -<br/>diagnosed<br/>asthma</b> | <b>Current<br/>Dry<br/>Cough</b> | <b>Curre<br/>nt<br/>LRTI</b> | <b>Current Nasal<br/>Allergies<br/>(Rhinitis)</b> | <b>Current Itchy<br/>Rash (Atopic<br/>Eczema)</b> | <b>Ever doctor-<br/>diagnosed<br/>Eczema</b> |
|------------------------------------------|-----------------------------------------------|----------------------------------|------------------------------|---------------------------------------------------|---------------------------------------------------|----------------------------------------------|
| Current wheeze                           | 0.49                                          | 0.31                             | 0.16                         | 0.19                                              | 0.15                                              | -0.04                                        |
| Ever doctor -<br>diagnosed<br>Asthma     |                                               | 0.16                             | 0.16                         | 0.21                                              | 0.10                                              | -0.02                                        |
| Current Cough                            |                                               |                                  | 0.18                         | 0.35                                              | 0.10                                              | 0,02                                         |
| Current LRTI                             |                                               |                                  |                              | 0.16                                              | 0.20                                              | 0.06                                         |
| Current Nasal<br>Allergies<br>(Rhinitis) |                                               |                                  |                              |                                                   | 0.05                                              | 0.02                                         |
| Current itchy<br>rash (Atopic<br>Eczema) |                                               |                                  |                              |                                                   |                                                   | 0.21                                         |

**Table S3:** Spearman correlation coefficients of averaged maternal specific gravity-adjusted urinary pesticide metabolite concentrations during pregnant with current children's concentration.

| Averaged prenatal concentration in Mother's | Current child concentrations |       |       |       |       |       |       |              |
|---------------------------------------------|------------------------------|-------|-------|-------|-------|-------|-------|--------------|
|                                             | TCP                          | ETU   | OHP   | OHT   | 2,4-D | 3PBA  | DCCA  | ΣPyrethroid* |
| TCP                                         | 0.07                         | 0.05  | 0.06  | -0.04 | 0.02  | -0.03 | -0.00 | -0.03        |
| ETU                                         | 0.10                         | 0.12  | 0.06  | -0.02 | 0.02  | -0.03 | -0.06 | -0.04        |
| OHP                                         | 0.13                         | 0.01  | 0.27  | -0.05 | 0.06  | -0.03 | -0.04 | -0.04        |
| OHT                                         | 0.07                         | 0.11  | -0.00 | 0.25  | 0.04  | 0.07  | 0.03  | 0.05         |
| 2,4-D                                       | 0.03                         | -0.11 | -0.02 | -0.17 | 0.20  | -0.01 | 0.03  | 0.02         |
| 3PBA                                        | 0.13                         | 0.00  | -0.06 | 0.00  | 0.05  | 0.14  | 0.12  | 0.13         |
| DCCA                                        | 0.17                         | -0.07 | -0.00 | -0.02 | -0.01 | 0.06  | 0.06  | 0.06         |
| Σ Pyrethroid*                               | 0.16                         | -0.04 | -0.03 | -0.01 | 0.02  | 0.09  | 0.08  | 0.08         |

*Abbreviations:* TCP: 3,5,6 trichloro-2-pyridinol, ETU: Ethylenethiourea, OHP: Hydroxypyrimethanil, OHT: 5-hydroxythiabenzazole, 2,4-D: 2,4-Dichlorophenoxyacetic acid 3-PBA: 3-Phenoxybenzoic acid, DCCA: 3-(2,2-dichlorovinyl)-2,2-dimethyl-cyclopropane-1-carboxylic acid

\*Σ Pyrethroid: Sum of PBA and DCCA

**Table S4:** Odds ratios adjusted for child's sex and maternal smoking during pregnancy for each **10-fold increase** in specific pesticide metabolite concentrations and childhood respiratory outcomes. ISA study at five years of age, Matina County, Costa Rica 2015-2016

|                                               | Current Wheeze<br>(N = 62) |        |      | Ever doctor-<br>diagnosed Asthma<br>(N= 37) |        |      | Current Dry<br>Cough<br>(N= 118) |        |      | Current LRTI<br>(N=15) |        |       |
|-----------------------------------------------|----------------------------|--------|------|---------------------------------------------|--------|------|----------------------------------|--------|------|------------------------|--------|-------|
|                                               | OR                         | 95% CI |      | OR                                          | 95% CI |      | OR                               | 95% CI |      | OR                     | 95% CI |       |
| <b><i>Prenatal metabolites* (n = 303)</i></b> |                            |        |      |                                             |        |      |                                  |        |      |                        |        |       |
| TCP                                           | 1.09                       | 0.41   | 2.76 | 0.81                                        | 0.22   | 2.58 | 0.93                             | 0.41   | 2.05 | 2.29                   | 0.43   | 9.47  |
| ETU                                           | 0.88                       | 0.26   | 2.73 | 0.42                                        | 0.08   | 1.74 | 1.40                             | 0.53   | 3.80 | 0.30                   | 0.02   | 2.76  |
| OHP                                           | 0.99                       | 0.63   | 1.53 | 0.97                                        | 0.55   | 1.65 | 1.04                             | 0.72   | 1.49 | 0.97                   | 0.41   | 2.07  |
| OHT                                           | 0.89                       | 0.63   | 1.22 | 0.86                                        | 0.56   | 1.28 | 1.15                             | 0.89   | 1.50 | 0.80                   | 0.39   | 1.44  |
| 2,4-D                                         | 1.40                       | 0.67   | 2.78 | 0.41                                        | 0.12   | 1.19 | 0.92                             | 0.48   | 1.70 | 1.02                   | 0.21   | 3.35  |
| 3PBA                                          | 1.91                       | 0.86   | 4.26 | 0.46                                        | 0.15   | 1.29 | 1.25                             | 0.64   | 2.44 | 0.85                   | 0.18   | 3.62  |
| DCCA                                          | 1.02                       | 0.47   | 2.20 | 0.35                                        | 0.12   | 0.93 | 0.78                             | 0.41   | 1.47 | 1.55                   | 0.38   | 6.23  |
| ∑ Pyrethroid**                                | 1.32                       | 0.58   | 2.99 | 0.33                                        | 0.11   | 0.96 | 0.96                             | 0.49   | 1.90 | 1.26                   | 0.27   | 5.41  |
| <b><i>Child metabolites* (n = 293)</i></b>    |                            |        |      |                                             |        |      |                                  |        |      |                        |        |       |
| TCP                                           | 0.60                       | 0.22   | 1.53 | 0.83                                        | 0.25   | 2.56 | 0.48                             | 0.21   | 1.06 | 1.79                   | 0.33   | 8.57  |
| ETU                                           | 0.86                       | 0.43   | 1.74 | 0.68                                        | 0.29   | 1.62 | 0.94                             | 0.52   | 1.69 | 2.70                   | 0.72   | 10.64 |
| OHP                                           | 1.30                       | 0.85   | 1.95 | 1.09                                        | 0.64   | 1.81 | 0.96                             | 0.67   | 1.36 | 1.45                   | 0.68   | 2.81  |
| OHT                                           | 1.08                       | 0.72   | 1.59 | 1.18                                        | 0.72   | 1.90 | 0.98                             | 0.70   | 1.36 | 1.48                   | 0.73   | 2.85  |
| 2,4-D                                         | 1.15                       | 0.58   | 2.17 | 1.21                                        | 0.51   | 2.57 | 0.75                             | 0.41   | 1.30 | 0.82                   | 0.20   | 2.53  |
| 3PBA                                          | 1.84                       | 0.96   | 3.62 | 2.17                                        | 0.96   | 5.07 | 1.36                             | 0.79   | 2.34 | 3.81                   | 1.13   | 13.68 |
| DCCA                                          | 1.96                       | 0.98   | 3.94 | 2.16                                        | 0.92   | 5.09 | 1.28                             | 0.72   | 2.28 | 3.18                   | 0.94   | 10.77 |
| ∑ Pyrethroid**                                | 1.99                       | 0.98   | 4.07 | 2.30                                        | 0.96   | 5.57 | 1.35                             | 0.75   | 2.43 | 3.74                   | 1.06   | 13.46 |

*Abbreviations:* OR: Odds ratios, CI: Confidence Intervals, TCP: 3,5,6 trichloro-2-pyridinol, ETU: Ethylene thiourea, OHP: Hydroxypyrimethanil, OHT: 5-hydroxythiabendazole, 2,4-D: 2,4-Dichlorophenoxyacetic acid 3-PBA: 3-Phenoxybenzoic acid, DCCA: 3-(2,2-dichlorovinyl)-2,2-dimethyl-cyclopropane-1-carboxylic acid

\*Variables dichotomized at 75th percentile; Reference: Below 75th percentile

\*\* ∑ Pyrethroid: Sum of PBA and DCCA

**Table S5:** Odds ratios adjusted for maternal smoking during pregnancy, child's sex of high ( $\geq P75$ ) specific pesticide exposures and childhood respiratory outcomes, including both **prenatal and current exposures** in the same model. ISA study at five years of age. Matina County. Costa Rica 2015-2016

|                                               | Current Wheeze<br>(N = 62) |        |      | Ever doctor-<br>diagnosed Asthma<br>(N= 37) |        |      | Current Dry<br>Cough<br>(N= 118) |        |      | Current LRTI<br>(N=15) |        |      |
|-----------------------------------------------|----------------------------|--------|------|---------------------------------------------|--------|------|----------------------------------|--------|------|------------------------|--------|------|
|                                               | OR                         | 95% CI |      | OR                                          | 95% CI |      | OR                               | 95% CI |      | OR                     | 95% CI |      |
| <b><i>Prenatal metabolites* (n = 303)</i></b> |                            |        |      |                                             |        |      |                                  |        |      |                        |        |      |
| TCP                                           | 1.50                       | 0.79   | 2.78 | 0.86                                        | 0.36   | 1.91 | 1.14                             | 0.66   | 1.95 | 1.00                   | 0.27   | 3.07 |
| ETU                                           | 1.29                       | 0.66   | 2.42 | 0.90                                        | 0.36   | 2.02 | 0.95                             | 0.55   | 1.64 | 1.04                   | 0.28   | 3.19 |
| OHP                                           | 0.52                       | 0.24   | 1.06 | 0.69                                        | 0.26   | 1.58 | 1.03                             | 0.59   | 1.77 | 0.72                   | 0.16   | 2.38 |
| OHT                                           | 0.63                       | 0.30   | 1.25 | 0.58                                        | 0.22   | 1.37 | 1.16                             | 0.67   | 2.01 | 0.35                   | 0.05   | 1.37 |
| 2.4-D                                         | 1.30                       | 0.66   | 2.49 | 0.51                                        | 0.17   | 1.28 | 0.96                             | 0.54   | 1.69 | 1.37                   | 0.39   | 4.24 |
| 3PBA                                          | 1.12                       | 0.58   | 2.12 | 0.50                                        | 0.18   | 1.20 | 1.13                             | 0.65   | 1.95 | 0.65                   | 0.14   | 2.15 |
| DCCA                                          | 0.82                       | 0.40   | 1.58 | 0.21                                        | 0.05   | 0.63 | 0.78                             | 0.44   | 1.36 | 1.03                   | 0.27   | 3.14 |
| $\Sigma$ Pyrethroid***                        | 1.05                       | 0.53   | 2.00 | 0.31                                        | 0.09   | 0.84 | 0.92                             | 0.52   | 1.59 | 1.01                   | 0.27   | 3.12 |
| <b><i>Child metabolites* (n = 293)</i></b>    |                            |        |      |                                             |        |      |                                  |        |      |                        |        |      |
| TCP                                           | 0.92                       | 0.46   | 1.76 | 1.15                                        | 0.50   | 2.48 | 0.78                             | 0.44   | 1.34 | 2.05                   | 0.66   | 5.91 |
| ETU                                           | 0.57                       | 0.26   | 1.14 | 0.67                                        | 0.26   | 1.54 | 0.94                             | 0.54   | 1.62 | 2.08                   | 0.67   | 6.03 |
| OHP                                           | 1.26                       | 0.65   | 2.37 | 1.43                                        | 0.64   | 3.06 | 1.28                             | 0.74   | 2.20 | 2.13                   | 0.69   | 6.16 |
| OHT                                           | 1.27                       | 0.65   | 2.42 | 1.98                                        | 0.90   | 4.23 | 0.88                             | 0.50   | 1.53 | 2.40                   | 0.76   | 7.08 |
| 2.4-D                                         | 0.78                       | 0.38   | 1.54 | 0.63                                        | 0.22   | 1.54 | 0.77                             | 0.43   | 1.35 | 1.35                   | 0.39   | 4.16 |
| 3PBA                                          | 1.71                       | 0.91   | 3.15 | 1.82                                        | 0.83   | 3.83 | 1.40                             | 0.81   | 2.39 | 2.80                   | 0.94   | 8.17 |
| DCCA                                          | 1.98                       | 1.06   | 3.64 | 2.29                                        | 1.06   | 4.86 | 1.37                             | 0.80   | 2.36 | 2.06                   | 0.67   | 5.94 |
| $\Sigma$ Pyrethroid***                        | 2.37                       | 1.28   | 4.34 | 2.22                                        | 1.03   | 4.69 | 1.59                             | 0.93   | 2.73 | 2.78                   | 0.94   | 8.06 |

Abbreviations: OR: Odds ratios. CI: Confidence Intervals

\*Variables dichotomized at 75th percentile; Reference: Below 75th percentile

\*\* $\Sigma$  Pyrethroid: Sum of PBA and DCCA

**Table S6:** Odds ratios adjusted for child's sex and maternal smoking during pregnancy for each **10-fold increase** in specific pesticide metabolite concentrations and childhood respiratory outcomes, including **prenatal and current exposures in the same model**. ISA study at five years of age, Matina County, Costa Rica 2015-2016

|                                               | Current Wheeze<br>(N = 62) |        |      | Ever doctor-<br>diagnosed Asthma<br>(N= 37) |        |      | Current Dry<br>Cough<br>(N= 118) |        |      | Current LRTI<br>(N=15) |        |       |
|-----------------------------------------------|----------------------------|--------|------|---------------------------------------------|--------|------|----------------------------------|--------|------|------------------------|--------|-------|
|                                               | OR**                       | 95% CI |      | OR**                                        | 95% CI |      | OR**                             | 95% CI |      | OR**                   | 95% CI |       |
| <b><i>Prenatal metabolites* (n = 303)</i></b> |                            |        |      |                                             |        |      |                                  |        |      |                        |        |       |
| TCP                                           | 1.09                       | 0.40   | 2.81 | 0.80                                        | 0.21   | 2.59 | 1.01                             | 0.44   | 2.26 | 2.12                   | 0.39   | 8.81  |
| ETU                                           | 0.88                       | 0.26   | 2.78 | 0.43                                        | 0.08   | 1.84 | 1.47                             | 0.54   | 4.02 | 0.20                   | 0.01   | 2.02  |
| OHP                                           | 0.91                       | 0.56   | 1.42 | 0.88                                        | 0.48   | 1.54 | 1.05                             | 0.72   | 1.52 | 0.93                   | 0.38   | 2.01  |
| OHT                                           | 0.85                       | 0.60   | 1.18 | 0.80                                        | 0.51   | 1.21 | 1.18                             | 0.90   | 1.56 | 0.73                   | 0.36   | 1.33  |
| 2,4-D                                         | 1.35                       | 0.64   | 2.73 | 0.37                                        | 0.10   | 1.10 | 0.99                             | 0.52   | 1.86 | 1.04                   | 0.21   | 3.47  |
| 3PBA                                          | 1.85                       | 0.79   | 4.33 | 0.33                                        | 0.10   | 1.02 | 1.26                             | 0.62   | 2.55 | 0.71                   | 0.14   | 3.37  |
| DCCA                                          | 0.99                       | 0.44   | 2.22 | 0.30                                        | 0.10   | 0.84 | 0.83                             | 0.43   | 1.63 | 1.49                   | 0.34   | 6.42  |
| ∑ Pyrethroid**                                | 1.29                       | 0.54   | 3.05 | 0.26                                        | 0.08   | 0.81 | 1.02                             | 0.50   | 2.08 | 1.18                   | 0.24   | 5.51  |
| <b><i>Child metabolites* (n = 293)</i></b>    |                            |        |      |                                             |        |      |                                  |        |      |                        |        |       |
| TCP                                           | 0.59                       | 0.22   | 1.52 | 0.84                                        | 0.25   | 2.59 | 0.48                             | 0.21   | 1.06 | 1.70                   | 0.31   | 8.34  |
| ETU                                           | 0.87                       | 0.43   | 1.77 | 0.72                                        | 0.30   | 1.77 | 0.91                             | 0.51   | 1.65 | 3.36                   | 0.83   | 14.84 |
| OHP                                           | 1.32                       | 0.86   | 1.99 | 1.12                                        | 0.64   | 1.85 | 0.95                             | 0.66   | 1.36 | 1.46                   | 0.68   | 2.83  |
| OHT                                           | 1.13                       | 0.75   | 1.69 | 1.25                                        | 0.75   | 2.03 | 0.93                             | 0.65   | 1.30 | 1.60                   | 0.79   | 3.12  |
| 2,4-D                                         | 1.10                       | 0.54   | 2.09 | 1.39                                        | 0.58   | 3.01 | 0.75                             | 0.41   | 1.32 | 0.81                   | 0.19   | 2.57  |
| 3PBA                                          | 1.75                       | 0.90   | 3.46 | 2.42                                        | 1.06   | 5.68 | 1.32                             | 0.77   | 2.30 | 3.92                   | 1.16   | 14.08 |
| DCCA                                          | 1.96                       | 0.98   | 3.95 | 2.37                                        | 1.00   | 5.69 | 1.30                             | 0.73   | 2.32 | 3.09                   | 0.90   | 10.50 |
| ∑ Pyrethroid**                                | 1.95                       | 0.96   | 4.01 | 2.53                                        | 1.05   | 6.23 | 1.34                             | 0.75   | 2.43 | 3.70                   | 1.04   | 13.37 |

Abbreviations: OR: Odds ratios, CI: Confidence Intervals

\*\* ∑ Pyrethroid: Sum of PBA and DCCA



**Table S8:** Odds ratios adjusted for maternal smoking during pregnancy, child's sex, parity, and breastfeeding history (asthma) as per high (≥75) or specific pesticide childhood respiratory and respiratory outcomes (seats of age) at age 6 years of age in a cohort of rural Ugandan children 2015-2016

|                                        | Current Wheeze<br>(N = 62) |        |      | Ever doctor-<br>diagnosed Asthma<br>(N= 37) |        |      | Current Dry<br>Cough<br>(N= 118) |        |      | Current LRTI<br>(N=15) |        |      |
|----------------------------------------|----------------------------|--------|------|---------------------------------------------|--------|------|----------------------------------|--------|------|------------------------|--------|------|
|                                        | OR*                        | 95% CI |      | OR*                                         | 95% CI |      | OR*                              | 95% CI |      | OR*                    | 95% CI |      |
| <b>Prenatal metabolites* (n = 303)</b> |                            |        |      |                                             |        |      |                                  |        |      |                        |        |      |
| TCP                                    | 1.62                       | 0.84   | 3.02 | 0.89                                        | 0.36   | 1.96 | 1.10                             | 0.64   | 1.88 | 1.09                   | 0.29   | 3.30 |
| ETU                                    | 1.20                       | 0.68   | 2.19 | 0.82                                        | 0.33   | 1.88 | 0.95                             | 0.52   | 1.66 | 1.14                   | 0.31   | 3.54 |
| OHP                                    | 0.54                       | 0.24   | 1.08 | 0.78                                        | 0.30   | 1.88 | 1.04                             | 0.60   | 1.78 | 0.76                   | 0.17   | 2.47 |
| OHT                                    | 0.68                       | 0.30   | 1.26 | 0.69                                        | 0.23   | 1.47 | 1.06                             | 0.64   | 1.88 | 0.43                   | 0.07   | 1.63 |
| 2,4-D                                  | 1.38                       | 0.66   | 2.66 | 0.40                                        | 0.17   | 1.20 | 0.80                             | 0.49   | 1.36 | 1.48                   | 0.44   | 4.36 |
| 3PBA                                   | 1.22                       | 0.68   | 2.19 | 0.55                                        | 0.21   | 1.38 | 1.26                             | 0.60   | 2.09 | 0.72                   | 0.16   | 2.40 |
| DCCA                                   | 0.88                       | 0.40   | 1.50 | 0.20                                        | 0.05   | 0.64 | 0.74                             | 0.43   | 1.38 | 1.06                   | 0.28   | 3.23 |
| ∑ Pyrethroid***                        | 1.22                       | 0.62   | 2.30 | 0.39                                        | 0.13   | 0.90 | 0.96                             | 0.55   | 1.66 | 1.04                   | 0.28   | 3.20 |
| <b>Child metabolites* (n = 293)</b>    |                            |        |      |                                             |        |      |                                  |        |      |                        |        |      |
| TCP                                    | 0.90                       | 0.45   | 1.72 | 1.11                                        | 0.48   | 2.40 | 0.78                             | 0.44   | 1.36 | 2.09                   | 0.68   | 6.04 |
| ETU                                    | 0.56                       | 0.26   | 1.14 | 0.64                                        | 0.25   | 1.49 | 0.94                             | 0.54   | 1.62 | 2.08                   | 0.68   | 6.03 |
| OHP                                    | 1.48                       | 0.73   | 2.87 | 1.60                                        | 0.69   | 3.42 | 1.33                             | 0.78   | 2.39 | 2.04                   | 0.65   | 6.03 |
| OHT                                    | 1.34                       | 0.63   | 2.50 | 1.85                                        | 0.89   | 4.44 | 0.95                             | 0.52   | 1.64 | 2.01                   | 0.65   | 5.83 |
| 2,4-D                                  | 0.84                       | 0.40   | 1.64 | 0.53                                        | 0.19   | 1.27 | 0.79                             | 0.44   | 1.34 | 1.50                   | 0.46   | 4.44 |
| 3PBA                                   | 1.66                       | 0.87   | 3.12 | 1.80                                        | 0.82   | 3.64 | 1.36                             | 0.88   | 2.32 | 2.73                   | 0.90   | 8.00 |
| DCCA                                   | 1.88                       | 1.00   | 3.49 | 2.05                                        | 0.96   | 4.38 | 1.34                             | 0.76   | 2.26 | 2.07                   | 0.67   | 5.99 |
| ∑ Pyrethroid***                        | 2.40                       | 1.28   | 4.46 | 2.10                                        | 0.98   | 4.89 | 1.53                             | 0.90   | 2.66 | 2.78                   | 0.94   | 8.08 |

Abbreviations: OR: Odds Ratio; CI: Confidence Intervals

\*Variables dichotomized at 75th percentile; Reference: Below 75th percentile

\*\*∑ Pyrethroid: Sum of 3PBA and DCCA

**Table S9:** Odds ratios adjusted for **current smoking in house**, **child's sex**, and **parity** of high ( $\geq P75$ ) specific pesticide exposures and **childhood respiratory outcomes**. ISA study at five years of age. Matina County. Costa Rica 2015-2016

|                                               | Current Wheeze<br>(N = 62) |        |      | Ever Asthma<br>(N= 37) |        |      | Current Dry Cough<br>(N= 118) |        |      | Current LRTI<br>(N=15) |        |      |
|-----------------------------------------------|----------------------------|--------|------|------------------------|--------|------|-------------------------------|--------|------|------------------------|--------|------|
|                                               | OR**                       | 95% CI |      | OR**                   | 95% CI |      | OR**                          | 95% CI |      | OR**                   | 95% CI |      |
| <b><i>Prenatal metabolites* (n = 303)</i></b> |                            |        |      |                        |        |      |                               |        |      |                        |        |      |
| TCP                                           | 1.55                       | 0.82   | 2.86 | 0.90                   | 0.38   | 1.96 | 1.17                          | 0.68   | 2.00 | 1.00                   | 0.27   | 3.09 |
| ETU                                           | 1.09                       | 0.56   | 2.04 | 0.76                   | 0.31   | 1.71 | 0.88                          | 0.51   | 1.51 | 1.19                   | 0.32   | 3.70 |
| OHP                                           | 0.57                       | 0.26   | 1.13 | 0.81                   | 0.33   | 1.81 | 1.01                          | 0.59   | 1.73 | 0.82                   | 0.18   | 2.75 |
| OHT                                           | 0.62                       | 0.30   | 1.22 | 0.64                   | 0.25   | 1.47 | 1.07                          | 0.62   | 1.82 | 0.46                   | 0.07   | 1.76 |
| 2.4-D                                         | 1.36                       | 0.71   | 2.54 | 0.55                   | 0.20   | 1.30 | 0.89                          | 0.51   | 1.52 | 1.53                   | 0.46   | 4.51 |
| 3PBA                                          | 1.18                       | 0.61   | 2.20 | 0.61                   | 0.23   | 1.40 | 1.18                          | 0.68   | 2.01 | 0.74                   | 0.16   | 2.47 |
| DCCA                                          | 0.82                       | 0.41   | 1.57 | 0.22                   | 0.05   | 0.64 | 0.76                          | 0.43   | 1.30 | 1.05                   | 0.28   | 3.23 |
| $\Sigma$ Pyrethroid***                        | 1.12                       | 0.58   | 2.10 | 0.40                   | 0.13   | 0.99 | 0.93                          | 0.54   | 1.59 | 1.03                   | 0.27   | 3.18 |
| <b><i>Child metabolites* (n = 293)</i></b>    |                            |        |      |                        |        |      |                               |        |      |                        |        |      |
| TCP                                           | 0.96                       | 0.48   | 1.83 | 1.24                   | 0.54   | 2.70 | 0.75                          | 0.42   | 1.30 | 2.59                   | 0.81   | 7.94 |
| ETU                                           | 0.57                       | 0.27   | 1.14 | 0.65                   | 0.25   | 1.50 | 0.95                          | 0.55   | 1.64 | 2.05                   | 0.66   | 5.99 |
| OHP                                           | 1.36                       | 0.70   | 2.60 | 1.53                   | 0.68   | 3.32 | 1.28                          | 0.74   | 2.20 | 2.09                   | 0.66   | 6.26 |
| OHT                                           | 1.23                       | 0.64   | 2.32 | 1.93                   | 0.89   | 4.06 | 0.91                          | 0.52   | 1.56 | 2.09                   | 0.67   | 6.12 |
| 2.4-D                                         | 0.76                       | 0.38   | 1.48 | 0.47                   | 0.17   | 1.15 | 0.79                          | 0.45   | 1.37 | 1.42                   | 0.42   | 4.25 |
| 3PBA                                          | 1.77                       | 0.94   | 3.29 | 1.72                   | 0.79   | 3.62 | 1.51                          | 0.88   | 2.61 | 2.46                   | 0.82   | 7.20 |
| DCCA                                          | 1.90                       | 1.02   | 3.51 | 1.97                   | 0.92   | 4.10 | 1.41                          | 0.82   | 2.43 | 1.91                   | 0.61   | 5.57 |
| $\Sigma$ Pyrethroid***                        | 2.38                       | 1.28   | 4.38 | 2.00                   | 0.93   | 4.17 | 1.66                          | 0.96   | 2.86 | 2.59                   | 0.86   | 7.58 |

Abbreviations: OR: Odds ratios. CI: Confidence Intervals

\*Variables dichotomized at 75th percentile; Reference: Below 75th percentile

\*\* $\Sigma$  Pyrethroid: Sum of PBA and DCCA

**Table S10.** Odds ratios adjusted for child's sex and maternal smoking during pregnancy for each **10-fold increase** in specific pesticide metabolite concentrations and **childhood allergic outcomes**. ISA study at five years of age, Matina County, Costa Rica 2015-2016

|                                       | Current Nasal Allergies<br>(Allergic Rhinitis)<br>(n = 63) |        |      | Current Itchy Rash<br>(Atopic Eczema)<br>(n = 39) |        |      | Ever doctor-<br>diagnosed Eczema<br>(n = 21) |        |      |
|---------------------------------------|------------------------------------------------------------|--------|------|---------------------------------------------------|--------|------|----------------------------------------------|--------|------|
|                                       | OR                                                         | 95% CI |      | OR                                                | 95% CI |      | OR                                           | 95% CI |      |
| <b>Prenatal metabolites (n = 303)</b> |                                                            |        |      |                                                   |        |      |                                              |        |      |
| TCP                                   | 0.63                                                       | 0.22   | 1.66 | 1.36                                              | 0.42   | 4.00 | 1.45                                         | 0.31   | 5.54 |
| ETU                                   | 1.06                                                       | 0.32   | 3.28 | 0.91                                              | 0.22   | 3.44 | 0.87                                         | 0.11   | 5.11 |
| OHP                                   | 1.40                                                       | 0.92   | 2.13 | 0.99                                              | 0.56   | 1.66 | 1.19                                         | 0.59   | 2.25 |
| OHT                                   | 0.86                                                       | 0.61   | 1.18 | 1.20                                              | 0.82   | 1.71 | 1.04                                         | 0.61   | 1.67 |
| 2,4-D                                 | 1.24                                                       | 0.59   | 2.46 | 0.82                                              | 0.29   | 1.99 | 0.45                                         | 0.09   | 1.63 |
| 3PBA                                  | 1.50                                                       | 0.68   | 3.30 | 0.54                                              | 0.19   | 1.47 | 2.19                                         | 0.62   | 7.40 |
| DCCA                                  | 1.57                                                       | 0.73   | 3.38 | 0.69                                              | 0.26   | 1.76 | 1.86                                         | 0.55   | 6.22 |
| ∑ Pyrethroid**                        | 1.52                                                       | 0.68   | 3.41 | 0.57                                              | 0.20   | 1.57 | 2.15                                         | 0.59   | 7.58 |
| <b>Child metabolites (n = 293)</b>    |                                                            |        |      |                                                   |        |      |                                              |        |      |
| TCP                                   | 0.80                                                       | 0.31   | 2.00 | 0.77                                              | 0.24   | 2.34 | 1.35                                         | 0.31   | 5.29 |
| ETU                                   | 0.65                                                       | 0.32   | 1.30 | 1.60                                              | 0.68   | 3.85 | 0.44                                         | 0.15   | 1.30 |
| OHP                                   | 1.10                                                       | 0.72   | 1.66 | 1.20                                              | 0.72   | 1.95 | 0.84                                         | 0.40   | 1.64 |
| OHT                                   | 1.04                                                       | 0.69   | 1.53 | 1.61                                              | 1.01   | 2.53 | 0.83                                         | 0.41   | 1.54 |
| 2,4-D                                 | 1.00                                                       | 0.50   | 1.90 | 1.13                                              | 0.48   | 2.38 | 0.93                                         | 0.28   | 2.45 |
| 3PBA                                  | 0.94                                                       | 0.49   | 1.80 | 3.00                                              | 1.34   | 6.99 | 1.41                                         | 0.51   | 3.96 |
| DCCA                                  | 0.95                                                       | 0.48   | 1.89 | 2.37                                              | 1.04   | 5.47 | 1.83                                         | 0.62   | 5.26 |
| ∑ Pyrethroid**                        | 0.91                                                       | 0.45   | 1.84 | 2.90                                              | 1.24   | 6.92 | 1.71                                         | 0.57   | 5.11 |

Abbreviations: OR: Odds ratios, CI: Confidence Intervals

\*\* ∑ Pyrethroid: Sum of PBA and DCCA

**Table S11:** Odds ratios adjusted for maternal smoking during pregnancy, child's sex of high ( $\geq P75$ ) specific pesticide exposures and **childhood allergic outcomes**, including **prenatal and current exposures** in the same model. ISA study at five years of age. Matina County. Costa Rica 2015-2016

|                                        | Current Nasal Allergies<br>(Allergic Rhinitis)<br>(n = 63) |        |      | Current Itchy Rash<br>(Atopic Eczema)<br>(n = 39) |        |      | Ever doctor-diagnosed<br>Eczema<br>(n = 21) |        |      |
|----------------------------------------|------------------------------------------------------------|--------|------|---------------------------------------------------|--------|------|---------------------------------------------|--------|------|
|                                        | OR**                                                       | 95% CI |      | OR**                                              | 95% CI |      | OR**                                        | 95% CI |      |
| <b>Prenatal metabolites* (n = 303)</b> |                                                            |        |      |                                                   |        |      |                                             |        |      |
| TCP                                    | 0.50                                                       | 0.23   | 1.01 | 0.76                                              | 0.31   | 1.69 | 0.66                                        | 0.18   | 1.86 |
| ETU                                    | 0.78                                                       | 0.38   | 1.52 | 0.63                                              | 0.24   | 1.46 | 0.70                                        | 0.20   | 1.99 |
| OHP                                    | 1.20                                                       | 0.62   | 2.23 | 1.07                                              | 0.46   | 2.29 | 2.51                                        | 0.98   | 6.23 |
| OHT                                    | 0.64                                                       | 0.30   | 1.26 | 1.26                                              | 0.56   | 2.66 | 1.09                                        | 0.34   | 2.97 |
| 2.4-D                                  | 1.43                                                       | 0.74   | 2.72 | 1.15                                              | 0.50   | 2.51 | 0.88                                        | 0.27   | 2.44 |
| 3PBA                                   | 1.10                                                       | 0.57   | 2.08 | 0.51                                              | 0.19   | 1.19 | 1.55                                        | 0.56   | 3.91 |
| DCCA                                   | 0.99                                                       | 0.50   | 1.88 | 1.13                                              | 0.50   | 2.41 | 1.21                                        | 0.42   | 3.12 |
| $\Sigma$ Pyrethroid***                 | 0.90                                                       | 0.45   | 1.72 | 0.81                                              | 0.33   | 1.80 | 1.58                                        | 0.57   | 4.00 |
| <b>Child metabolites* (n = 293)</b>    |                                                            |        |      |                                                   |        |      |                                             |        |      |
| TCP                                    | 0.99                                                       | 0.50   | 1.87 | 0.59                                              | 0.22   | 1.35 | 0.93                                        | 0.30   | 2.48 |
| ETU                                    | 0.52                                                       | 0.24   | 1.05 | 1.41                                              | 0.64   | 2.97 | 0.30                                        | 0.05   | 1.07 |
| OHP                                    | 1.30                                                       | 0.68   | 2.42 | 1.23                                              | 0.55   | 2.61 | 0.62                                        | 0.17   | 1.78 |
| OHT                                    | 1.28                                                       | 0.66   | 2.43 | 1.50                                              | 0.69   | 3.15 | 0.29                                        | 0.04   | 1.04 |
| 2.4-D                                  | 1.08                                                       | 0.54   | 2.06 | 1.12                                              | 0.48   | 2.43 | 1.28                                        | 0.43   | 3.42 |
| 3PBA                                   | 0.85                                                       | 0.42   | 1.62 | 2.71                                              | 1.30   | 5.58 | 1.19                                        | 0.41   | 3.09 |
| DCCA                                   | 0.76                                                       | 0.37   | 1.46 | 2.07                                              | 0.98   | 4.25 | 1.18                                        | 0.41   | 3.03 |
| $\Sigma$ Pyrethroid***                 | 0.86                                                       | 0.43   | 1.64 | 2.77                                              | 1.34   | 5.68 | 1.51                                        | 0.55   | 3.80 |

Abbreviations: OR: Odds ratios. CI: Confidence Intervals

\*Variables dichotomized at 75th percentile; Reference: Below 75th percentile

\*\*  $\Sigma$  Pyrethroid: Sum of PBA and DCCA

**Table S12.** Odds ratios adjusted for child's sex and maternal smoking during pregnancy for each **10-fold increase** in specific pesticide metabolite concentrations and **childhood allergic outcomes, including prenatal and current exposures** in the same model. ISA study at five years of age, Matina County, Costa Rica 2015-2016

|                                         | Current Nasal Allergies<br>(Allergic Rhinitis)<br>(n = 63) |        |      | Current Itchy Rash<br>(Atopic Eczema)<br>(n = 39) |        |      | Ever doctor-diagnosed<br>Eczema<br>(n = 21) |        |      |
|-----------------------------------------|------------------------------------------------------------|--------|------|---------------------------------------------------|--------|------|---------------------------------------------|--------|------|
|                                         | OR                                                         | 95% CI |      | OR                                                | 95% CI |      | OR                                          | 95% CI |      |
| <b>Prenatal metabolites * (n = 303)</b> |                                                            |        |      |                                                   |        |      |                                             |        |      |
| TCP                                     | 0.65                                                       | 0.23   | 1.74 | 1.29                                              | 0.39   | 3.84 | 1.35                                        | 0.28   | 5.20 |
| ETU                                     | 1.19                                                       | 0.35   | 3.71 | 0.78                                              | 0.18   | 3.08 | 0.95                                        | 0.13   | 5.50 |
| OHP                                     | 1.32                                                       | 0.85   | 2.02 | 0.98                                              | 0.55   | 1.65 | 1.26                                        | 0.62   | 2.38 |
| OHT                                     | 0.84                                                       | 0.59   | 1.18 | 1.09                                              | 0.74   | 1.57 | 1.09                                        | 0.63   | 1.78 |
| 2,4-D                                   | 1.29                                                       | 0.61   | 2.61 | 0.76                                              | 0.26   | 1.88 | 0.43                                        | 0.08   | 1.60 |
| 3PBA                                    | 1.38                                                       | 0.60   | 3.18 | 0.46                                              | 0.15   | 1.34 | 2.33                                        | 0.63   | 8.37 |
| DCCA                                    | 1.53                                                       | 0.69   | 3.42 | 0.67                                              | 0.24   | 1.78 | 1.89                                        | 0.54   | 6.66 |
| ∑ Pyrethroid**                          | 1.45                                                       | 0.62   | 3.38 | 0.54                                              | 0.18   | 1.55 | 2.25                                        | 0.60   | 8.46 |
| <b>Child metabolites * (n = 293)</b>    |                                                            |        |      |                                                   |        |      |                                             |        |      |
| TCP                                     | 0.82                                                       | 0.32   | 2.07 | 0.76                                              | 0.24   | 2.31 | 1.32                                        | 0.30   | 5.22 |
| ETU                                     | 0.64                                                       | 0.32   | 1.29 | 1.64                                              | 0.69   | 4.06 | 0.44                                        | 0.15   | 1.31 |
| OHP                                     | 1.05                                                       | 0.68   | 1.60 | 1.21                                              | 0.71   | 1.97 | 0.80                                        | 0.36   | 1.59 |
| OHT                                     | 1.09                                                       | 0.72   | 1.63 | 1.57                                              | 0.97   | 2.50 | 0.80                                        | 0.39   | 1.53 |
| 2,4-D                                   | 0.96                                                       | 0.47   | 1.84 | 1.18                                              | 0.50   | 2.51 | 1.06                                        | 0.32   | 2.82 |
| 3PBA                                    | 0.91                                                       | 0.47   | 1.75 | 3.24                                              | 1.44   | 7.60 | 1.31                                        | 0.46   | 3.77 |
| DCCA                                    | 0.92                                                       | 0.46   | 1.83 | 2.44                                              | 1.06   | 5.67 | 1.76                                        | 0.60   | 5.08 |
| ∑ Pyrethroid**                          | 0.89                                                       | 0.44   | 1.80 | 3.03                                              | 1.29   | 7.29 | 1.63                                        | 0.53   | 4.92 |

Abbreviations: OR: Odds ratios. CI: Confidence Intervals

\*Variables dichotomized at 75th percentile; Reference: Below 75th percentile

\*\* ∑ Pyrethroid: Sum of PBA and DCCA

**Table S13:** Odds ratios adjusted for maternal smoking during pregnancy, child's sex, parity, and maternal history of asthma (yes/no), of high ( $\geq P75$ ) specific pesticide exposures and childhood allergic outcomes. ISA study at five years of age. Matina County, Costa Rica 2015-2016

|                                               | Current Nasal Allergies<br>(Allergic Rhinitis)<br>(n = 63) |        |      | Current Itchy Rash<br>(Atopic Eczema)<br>(n = 39) |        |      | Ever doctor-diagnosed<br>Eczema<br>(n = 21) |        |      |
|-----------------------------------------------|------------------------------------------------------------|--------|------|---------------------------------------------------|--------|------|---------------------------------------------|--------|------|
|                                               | OR                                                         | 95% CI |      | OR                                                | 95% CI |      | OR                                          | 95% CI |      |
| <b><i>Prenatal metabolites* (n = 303)</i></b> |                                                            |        |      |                                                   |        |      |                                             |        |      |
| TCP                                           | 0.49                                                       | 0.22   | 0.99 | 0.80                                              | 0.33   | 1.76 | 0.71                                        | 0.20   | 2.01 |
| ETU                                           | 0.73                                                       | 0.36   | 1.41 | 0.70                                              | 0.27   | 1.61 | 0.74                                        | 0.20   | 2.12 |
| OHP                                           | 1.37                                                       | 0.73   | 2.52 | 1.05                                              | 0.46   | 2.25 | 2.46                                        | 0.96   | 6.15 |
| OHT                                           | 0.62                                                       | 0.30   | 1.21 | 1.38                                              | 0.63   | 2.90 | 0.90                                        | 0.28   | 2.44 |
| 2,4-D                                         | 1.43                                                       | 0.75   | 2.64 | 1.22                                              | 0.54   | 2.58 | 1.02                                        | 0.32   | 2.80 |
| 3PBA                                          | 1.23                                                       | 0.64   | 2.29 | 0.55                                              | 0.21   | 1.29 | 1.71                                        | 0.61   | 4.38 |
| DCCA                                          | 1.04                                                       | 0.53   | 1.95 | 1.16                                              | 0.51   | 2.45 | 1.33                                        | 0.46   | 3.48 |
| $\Sigma$ Pyrethroid***                        | 1.03                                                       | 0.53   | 1.94 | 0.84                                              | 0.35   | 1.84 | 1.78                                        | 0.64   | 4.61 |
| <b><i>Child metabolites* (n = 293)</i></b>    |                                                            |        |      |                                                   |        |      |                                             |        |      |
| TCP                                           | 0.95                                                       | 0.48   | 1.79 | 0.59                                              | 0.22   | 1.35 | 0.92                                        | 0.29   | 2.46 |
| ETU                                           | 0.51                                                       | 0.23   | 1.04 | 1.37                                              | 0.63   | 2.87 | 0.29                                        | 0.05   | 1.04 |
| OHP                                           | 1.40                                                       | 0.73   | 2.63 | 1.22                                              | 0.54   | 2.60 | 0.71                                        | 0.20   | 2.05 |
| OHT                                           | 1.23                                                       | 0.64   | 2.30 | 1.60                                              | 0.74   | 3.34 | 0.31                                        | 0.05   | 1.12 |
| 2,4-D                                         | 1.21                                                       | 0.62   | 2.27 | 1.20                                              | 0.53   | 2.55 | 1.35                                        | 0.46   | 3.55 |
| 3PBA                                          | 0.83                                                       | 0.41   | 1.59 | 2.53                                              | 1.22   | 5.18 | 1.13                                        | 0.38   | 2.95 |
| DCCA                                          | 0.74                                                       | 0.36   | 1.43 | 2.07                                              | 0.99   | 4.26 | 1.13                                        | 0.39   | 2.93 |
| $\Sigma$ Pyrethroid***                        | 0.84                                                       | 0.42   | 1.61 | 2.70                                              | 1.31   | 5.54 | 1.48                                        | 0.54   | 3.75 |

Abbreviations: OR: Odds ratios. CI: Confidence Intervals

\*Variables dichotomized at 75th percentile; Reference: Below 75th percentile

\*\* $\Sigma$  Pyrethroid: Sum of PBA and DCCA

**Table S14:** Odds ratios adjusted for maternal smoking during pregnancy, child's sex, parity, and breastfeeding of high ( $\geq 75$ ) specific pesticide exposures and childhood allergic outcomes. ISA study at five years of age. Matina County. Costa Rica 2015-2016

|                                        | Current Nasal Allergies<br>(Allergic Rhinitis)<br>(n = 63) |        |      | Current Itchy Rash<br>(Atopic Eczema)<br>(n = 39) |        |      | Ever doctor-diagnosed<br>Eczema<br>(n = 21) |        |      |
|----------------------------------------|------------------------------------------------------------|--------|------|---------------------------------------------------|--------|------|---------------------------------------------|--------|------|
|                                        | OR**                                                       | 95% CI |      | OR**                                              | 95% CI |      | OR**                                        | 95% CI |      |
| <b>Prenatal metabolites* (n = 303)</b> |                                                            |        |      |                                                   |        |      |                                             |        |      |
| TCP                                    | 0.48                                                       | 0.22   | 0.97 | 0.80                                              | 0.33   | 1.75 | 0.68                                        | 0.19   | 1.93 |
| ETU                                    | 0.71                                                       | 0.35   | 1.38 | 0.68                                              | 0.26   | 1.57 | 0.68                                        | 0.19   | 1.94 |
| OHP                                    | 1.36                                                       | 0.72   | 2.49 | 1.07                                              | 0.47   | 2.30 | 2.44                                        | 0.95   | 6.03 |
| OHT                                    | 0.64                                                       | 0.31   | 1.25 | 1.36                                              | 0.62   | 2.86 | 0.93                                        | 0.29   | 2.49 |
| 2.4-D                                  | 1.38                                                       | 0.73   | 2.55 | 1.21                                              | 0.54   | 2.54 | 0.94                                        | 0.30   | 2.53 |
| 3PBA                                   | 1.21                                                       | 0.63   | 2.25 | 0.54                                              | 0.20   | 1.27 | 1.59                                        | 0.57   | 4.05 |
| DCCA                                   | 1.02                                                       | 0.52   | 1.91 | 1.13                                              | 0.50   | 2.38 | 1.21                                        | 0.42   | 3.10 |
| $\Sigma$ Pyrethroid***                 | 1.01                                                       | 0.52   | 1.90 | 0.81                                              | 0.34   | 1.76 | 1.56                                        | 0.57   | 3.96 |
| <b>Child metabolites* (n = 293)</b>    |                                                            |        |      |                                                   |        |      |                                             |        |      |
| TCP                                    | 0.95                                                       | 0.48   | 1.80 | 0.59                                              | 0.22   | 1.36 | 0.93                                        | 0.29   | 2.47 |
| ETU                                    | 0.52                                                       | 0.23   | 1.04 | 1.36                                              | 0.62   | 2.85 | 0.29                                        | 0.05   | 1.04 |
| OHP                                    | 1.32                                                       | 0.69   | 2.48 | 1.22                                              | 0.54   | 2.62 | 0.67                                        | 0.18   | 1.91 |
| OHT                                    | 1.20                                                       | 0.62   | 2.24 | 1.54                                              | 0.71   | 3.19 | 0.29                                        | 0.05   | 1.03 |
| 2.4-D                                  | 1.21                                                       | 0.62   | 2.26 | 1.15                                              | 0.51   | 2.45 | 1.25                                        | 0.43   | 3.24 |
| 3PBA                                   | 0.85                                                       | 0.42   | 1.63 | 2.59                                              | 1.25   | 5.29 | 1.23                                        | 0.42   | 3.18 |
| DCCA                                   | 0.75                                                       | 0.37   | 1.44 | 2.13                                              | 1.01   | 4.39 | 1.20                                        | 0.41   | 3.10 |
| $\Sigma$ Pyrethroid***                 | 0.84                                                       | 0.42   | 1.61 | 2.79                                              | 1.34   | 5.73 | 1.55                                        | 0.57   | 3.91 |

Abbreviations: OR: Odds ratios. CI: Confidence Intervals

\*Variables dichotomized at 75th percentile; Reference: Below 75th percentile

\*\*  $\Sigma$  Pyrethroid: Sum of PBA and DCCA

**Table S15:** Odds ratios adjusted for **current smoking in house**, **child's sex**, and **parity** of high ( $\geq P75$ ) specific pesticide exposures and **childhood allergic outcomes**. ISA study at five years of age. Matina County, Costa Rica 2015-2016

|                                        | Current Nasal Allergies<br>(Allergic Rhinitis)<br>(n = 63) |        |      | Current Itchy Rash<br>(Atopic Eczema)<br>(n = 39) |        |      | Ever doctor-diagnosed<br>Eczema<br>(n = 21) |        |      |
|----------------------------------------|------------------------------------------------------------|--------|------|---------------------------------------------------|--------|------|---------------------------------------------|--------|------|
|                                        | OR**                                                       | 95% CI |      | OR**                                              | 95% CI |      | OR**                                        | 95% CI |      |
| <b>Prenatal metabolites* (n = 303)</b> |                                                            |        |      |                                                   |        |      |                                             |        |      |
| TCP                                    | 0.50                                                       | 0.23   | 1.00 | 0.87                                              | 0.37   | 1.87 | 0.68                                        | 0.19   | 1.92 |
| ETU                                    | 0.71                                                       | 0.35   | 1.36 | 0.63                                              | 0.25   | 1.43 | 0.68                                        | 0.19   | 1.94 |
| OHP                                    | 1.37                                                       | 0.73   | 2.51 | 1.06                                              | 0.47   | 2.24 | 2.41                                        | 0.94   | 5.96 |
| OHT                                    | 0.63                                                       | 0.30   | 1.22 | 1.41                                              | 0.65   | 2.91 | 0.94                                        | 0.30   | 2.52 |
| 2,4-D                                  | 1.41                                                       | 0.75   | 2.59 | 1.38                                              | 0.64   | 2.83 | 0.94                                        | 0.30   | 2.49 |
| 3PBA                                   | 1.22                                                       | 0.64   | 2.26 | 0.62                                              | 0.24   | 1.41 | 1.59                                        | 0.58   | 4.04 |
| DCCA                                   | 1.02                                                       | 0.53   | 1.91 | 1.19                                              | 0.54   | 2.48 | 1.21                                        | 0.42   | 3.12 |
| $\Sigma$ Pyrethroid***                 | 1.01                                                       | 0.52   | 1.90 | 0.87                                              | 0.37   | 1.87 | 1.58                                        | 0.58   | 3.98 |
| <b>Child metabolites* (n = 293)</b>    |                                                            |        |      |                                                   |        |      |                                             |        |      |
| TCP                                    | 0.93                                                       | 0.47   | 1.76 | 0.63                                              | 0.24   | 1.42 | 0.92                                        | 0.29   | 2.47 |
| ETU                                    | 0.52                                                       | 0.24   | 1.04 | 1.37                                              | 0.64   | 2.83 | 0.29                                        | 0.05   | 1.05 |
| OHP                                    | 1.35                                                       | 0.70   | 2.52 | 1.17                                              | 0.52   | 2.45 | 0.66                                        | 0.18   | 1.88 |
| OHT                                    | 1.19                                                       | 0.62   | 2.21 | 1.58                                              | 0.74   | 3.12 | 0.29                                        | 0.05   | 1.03 |
| 2,4-D                                  | 1.20                                                       | 0.62   | 2.25 | 1.19                                              | 0.54   | 2.49 | 1.26                                        | 0.43   | 3.27 |
| 3PBA                                   | 0.88                                                       | 0.44   | 1.68 | 2.63                                              | 1.29   | 5.31 | 1.23                                        | 0.42   | 3.20 |
| DCCA                                   | 0.77                                                       | 0.38   | 1.49 | 2.05                                              | 0.99   | 4.15 | 1.20                                        | 0.41   | 3.10 |
| $\Sigma$ Pyrethroid***                 | 0.87                                                       | 0.43   | 1.67 | 2.65                                              | 1.30   | 5.33 | 1.55                                        | 0.57   | 3.91 |

Abbreviations: OR: Odds ratios. CI: Confidence Intervals

\*Variables dichotomized at 75th percentile; Reference: Below 75th percentile

\*\*  $\Sigma$  Pyrethroid: Sum of PBA and DCCA



**Table S16:** Odds ratios adjusted for maternal smoking during pregnancy and child's sex for recent environmental exposures and current **respiratory outcomes** in 293 five-year-old children from the ISA study. Matina County. Costa Rica. 2015-2016

|                                                     | <i>n</i> | <i>%</i> | Current Wheeze<br>(N = 62) |        |      | Ever doctor-<br>diagnosed Asthma<br>(N= 37) |        |      | Current dry cough<br>(N= 118) |        |      | Current LRTI<br>(N=49) |        |       |
|-----------------------------------------------------|----------|----------|----------------------------|--------|------|---------------------------------------------|--------|------|-------------------------------|--------|------|------------------------|--------|-------|
|                                                     |          |          | OR                         | 95% CI |      | OR                                          | 95% CI |      | OR                            | 95% CI |      | OR                     | 95% CI |       |
| Current maternal banana work                        | 43       | 14       | 0.63                       | 0.23   | 1.47 | 1.38                                        | 0.48   | 3.41 | 1.06                          | 0.54   | 2.06 | 0.94                   | 0.14   | 3.62  |
| Maternal work in banana plantation in last 3 years  | 88       | 29       | 1.01                       | 0.54   | 1.86 | 1.22                                        | 0.56   | 2.54 | 1.08                          | 0.64   | 1.79 | 0.90                   | 0.24   | 2.73  |
| Current maternal work in agriculture                | 49       | 16       | 0.63                       | 0.25   | 1.42 | 1.14                                        | 0.40   | 2.79 | 1.23                          | 0.65   | 2.29 | 1.31                   | 0.29   | 4.38  |
| Maternal work in agriculture in last 3 years        | 99       | 33       | 1.00                       | 0.54   | 1.80 | 1.17                                        | 0.55   | 2.40 | 1.19                          | 0.72   | 1.95 | 1.05                   | 0.32   | 3.04  |
| Current paternal work in banana plantation          | 138      | 46       | 0.53                       | 0.28   | 0.95 | 1.01                                        | 0.48   | 2.11 | 1.05                          | 0.65   | 1.71 | 0.86                   | 0.27   | 2.66  |
| Paternal work in banana plantations in last 3 years | 156      | 51       | 0.68                       | 0.38   | 1.20 | 0.87                                        | 0.43   | 1.74 | 0.99                          | 0.62   | 1.57 | 0.58                   | 0.19   | 1.64  |
| ≥50 meters distance to banana plantations           | 232      | 75       | 0.59                       | 0.25   | 1.27 | 0.65                                        | 0.21   | 1.63 | 1.35                          | 0.74   | 2.43 | 0.67                   | 0.10   | 2.53  |
| Current vector control                              | 169      | 56       | 1.17                       | 0.65   | 2.13 | 1.03                                        | 0.50   | 2.19 | 1.77                          | 1.08   | 2.91 | 2.78                   | 0.84   | 12.53 |
| Use of pesticides inside the house                  | 152      | 50       | 1.40                       | 0.78   | 2.55 | 0.99                                        | 0.47   | 2.07 | 0.96                          | 0.60   | 1.54 | 0.50                   | 0.15   | 1.50  |
| Daily exposure to smoke of waste burning            | 50       | 17       | 0.53                       | 0.20   | 1.20 | 0.34                                        | 0.08   | 1.04 | 1.28                          | 0.68   | 2.38 | 1.27                   | 0.28   | 4.24  |
| 1-HP*                                               | 74       | 25       | 1.28                       | 0.66   | 2.40 | 1.53                                        | 0.68   | 3.29 | 1.42                          | 0.82   | 2.44 | 0.75                   | 0.17   | 2.48  |
| 2-OH-PH*                                            | 74       | 25       | 0.84                       | 0.42   | 1.62 | 0.66                                        | 0.25   | 1.53 | 1.40                          | 0.81   | 2.40 | 1.10                   | 0.30   | 3.36  |

*Abbreviations:* OR: Odds ratios. CI: Confidence Intervals. 1-HP: 1-hydroxypyrene. 2-OH-PH: hydroxyphenanthrene

\*Variables dichotomized at 75th percentile; Reference: Below 75th percentile

**Table S17:** Odds ratios adjusted for maternal smoking during pregnancy and child's sex for recent environmental exposures and current **allergic outcomes** in 293 five-year-old children from the ISA study. Matina County, Costa Rica. 2015-2016

|                                                                                               | <i>n</i> | <i>%</i> | Current Nasal Allergies (Allergic Rhinitis) (n = 63) |      |      | Current Itchy Rash (Atopic Eczema) (n = 39) |      |      | Ever doctor-diagnosed Eczema (n = 21) |        |      | Current Nasal Allergies (Allergic Rhinitis) (n = 63) |      |       |
|-----------------------------------------------------------------------------------------------|----------|----------|------------------------------------------------------|------|------|---------------------------------------------|------|------|---------------------------------------|--------|------|------------------------------------------------------|------|-------|
|                                                                                               |          |          | OR                                                   | OR   | OR   | 95% CI                                      | OR   | OR   | OR                                    | 95% CI | OR   | OR                                                   | OR   |       |
| Current maternal banana work                                                                  | 43       | 14       | 1.86                                                 | 0.85 | 0.35 | 1.86                                        | 0.85 | 0.35 | 1.86                                  | 0.85   | 0.35 | 1.86                                                 | 0.14 | 3.62  |
| Maternal work in banana plantation in last 3 years                                            | 88       | 29       | 1.78                                                 | 0.98 | 0.52 | 1.78                                        | 0.98 | 0.52 | 1.78                                  | 0.98   | 0.52 | 1.78                                                 | 0.24 | 2.73  |
| Current maternal work in agriculture                                                          | 49       | 16       | 2.00                                                 | 0.96 | 0.43 | 2.00                                        | 0.96 | 0.43 | 2.00                                  | 0.96   | 0.43 | 2.00                                                 | 0.29 | 4.38  |
| Maternal work in agriculture in last 3 years                                                  | 99       | 33       | 1.71                                                 | 0.95 | 0.52 | 1.71                                        | 0.95 | 0.52 | 1.71                                  | 0.95   | 0.52 | 1.71                                                 | 0.32 | 3.04  |
| Current paternal work in banana plantation                                                    | 138      | 46       | 1.66                                                 | 0.93 | 0.52 | 1.66                                        | 0.93 | 0.52 | 1.66                                  | 0.93   | 0.52 | 1.66                                                 | 0.27 | 2.66  |
| Paternal work in banana plantations in last 3 years                                           | 156      | 51       | 1.47                                                 | 0.84 | 0.48 | 1.47                                        | 0.84 | 0.48 | 1.47                                  | 0.84   | 0.48 | 1.47                                                 | 0.19 | 1.64  |
| Paternal work in banana plantations in last 3 years ≥50 meters distance to banana plantations | 232      | 75       | 1.84                                                 | 0.92 | 0.42 | 1.84                                        | 0.92 | 0.42 | 1.84                                  | 0.92   | 0.42 | 1.84                                                 | 0.10 | 2.53  |
| Current vector control                                                                        | 169      | 56       | 1.69                                                 | 0.95 | 0.53 | 1.69                                        | 0.95 | 0.53 | 1.69                                  | 0.95   | 0.53 | 1.69                                                 | 0.84 | 12.53 |
| Use of pesticides inside the house                                                            | 152      | 50       | 2.06                                                 | 1.16 | 0.66 | 2.06                                        | 1.16 | 0.66 | 2.06                                  | 1.16   | 0.66 | 2.06                                                 | 0.15 | 1.50  |
| Daily exposure to smoke of waste burning                                                      | 50       | 17       | 2.47                                                 | 1.23 | 0.58 | 2.47                                        | 1.23 | 0.58 | 2.47                                  | 1.23   | 0.58 | 2.47                                                 | 0.28 | 4.24  |
| 1-HP*                                                                                         | 74       | 25       | 2.99                                                 | 1.62 | 0.86 | 2.99                                        | 1.62 | 0.86 | 2.99                                  | 1.62   | 0.86 | 2.99                                                 | 0.17 | 2.48  |
| 2-OH-PH*                                                                                      | 74       | 25       | 1.17                                                 | 0.59 | 0.28 | 1.17                                        | 0.59 | 0.28 | 1.17                                  | 0.59   | 0.28 | 1.17                                                 | 0.30 | 3.36  |

*Abbreviations:* OR: Odds ratios. CI: Confidence Intervals. 1-HP: 1-hydroxypyrene. 2-OH-PH: hydroxyphenanthrene

\*Variables dichotomized at 75th percentile; Reference: Below 75th percentile
